# Supplementary material
Source: PubMed Central journal article supplement (PMC4919000)
Supplement: jcsm.12.7.989s1.pdf [file jcsm.12.7.989s1.pdf]

**Table S1. Association between selective serotonin reuptake inhibitor use and the global Pittsburg Sleep Quality Index score and its subcomponents stratified by concurrent psycholeptic drug use.**

|                                 | Number of measurements | Global PSQI score              | Subcomponent PSQI           |                      |                             |                      |                      |                      |
|---------------------------------|------------------------|--------------------------------|-----------------------------|----------------------|-----------------------------|----------------------|----------------------|----------------------|
|                                 |                        |                                | Sleep duration              | Sleep onset latency  | Sleep quality               | Daytime dysfunction  | Sleep disturbances   | Sleep efficiency     |
|                                 |                        | B in points (95%CI)            | B in hours (95% CI)         | OR (95%CI)           | OR (95%CI)                  | OR (95%CI)           | OR (95%CI)           | OR (95%CI)           |
| <b>No psycholeptic drug use</b> |                        |                                |                             |                      |                             |                      |                      |                      |
| Non-SSRI use                    | 12,840                 | Ref                            | Ref                         | Ref                  | Ref                         | Ref                  | Ref                  | Ref                  |
| SSRI use                        | 292                    | <b>-0.57</b><br>(-0.94; -0.20) | <b>0.57</b><br>(0.40; 0.74) | 0.93<br>(0.67; 1.30) | <b>0.55</b><br>(0.36; 0.83) | 1.37<br>(0.84; 2.24) | 0.84<br>(0.45; 1.57) | 0.68<br>(0.45; 1.01) |
| <b>Psycholeptic drug use</b>    |                        |                                |                             |                      |                             |                      |                      |                      |
| Non-SSRI use                    | 1,473                  | Ref                            | Ref                         | Ref                  | Ref                         | Ref                  | Ref                  | Ref                  |
| SSRI use                        | 166                    | <b>-1.09</b><br>(-1.71; -0.47) | <b>0.91</b><br>(0.65; 1.17) | 0.78<br>(0.53; 1.16) | <b>0.55</b><br>(0.36; 0.84) | 1.59<br>(0.94; 2.68) | 0.92<br>(0.51; 1.66) | 0.68<br>(0.45; 1.04) |

Global PSQI score and sleep duration are presented as B, representing higher = worse sleep or longer sleep duration. Other subcomponents are represented as odds ratio, representing higher = worse sleep. Adjusted for age, sex, educational level, employment status, body mass index, Center for Epidemiological Studies Depression Scale score and alcohol intake. Abbreviations: SSRI=Selective Serotonin Reuptake Inhibitor, PSQI=Pittsburg Sleep Quality Index, B= mean difference in study outcome between SSRI use versus non-use of antidepressants, OR= odds ratio, ref=reference group.
